# Supplementary material for: Simple Shared Motifs (SSM) in conserved region of promoters: a new approach to identify co-regulation patterns
Source: PubMed Central journal article supplement (PMC3215511; doi:10.1186/1471-2105-12-365), 2011-09-12

A)

Gene 1 atomic motifs

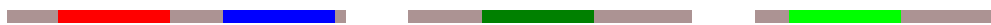

Gene 2 atomic motifs

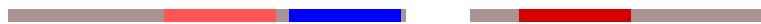

B)

- PreSSM 1: Extended sequence:  Genes: 1
- PreSSM 2: Extended sequence:  Genes: 1, 2
- PreSSM 3: Extended sequence:  Genes: 1
- PreSSM 4: Extended sequence:  Genes: 1
- PreSSM 5: Extended sequence:  Genes: 2
- PreSSM 6: Extended sequence:  Genes: 2
- ...

C)

Genes: 1,2

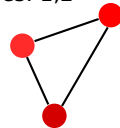— : Hamming distance  $\leq d$ 

Genes: 1,2

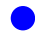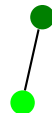

Genes: 1

D)

2 SSM:

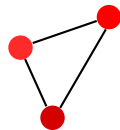

and

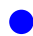

Supplement: 1471-2105-12-365-S1.pdf [file 1471-2105-12-365-S1.pdf]
